# Supplementary material for: First evaluation of the GEMS formaldehyde retrieval algorithm against TROPOMI and ground-based column measurements during the in-orbit test period
Source: Copernicus journal article supplement (doi:10.5194/egusphere-2023-1918), 2023-09-01
Supplement: Supplementary file 1 [file egusphere-2023-1918-supplement.pdf]

## *Supplement of*

# **First evaluation of the GEMS formaldehyde retrieval algorithm against TROPOMI and ground-based column measurements during the in-orbit test period**

**Gitaek T. Lee et al.**

*Correspondence to:* Rokjin J. Park (rjpark@snu.ac.kr) and Hyeong-Ahn Kwon (hakwon@suwon.ac.kr)

**Table S1. Summary of the data field variables archived in GEMS Level 2 HCHO product. Layer, spatial, and image represent the number of vertical layers of the a priori profile, cross-track, and along-track of the GEMS observation.**

| Variable name         | Description                                   | Unit                       | Dimensions              |
|-----------------------|-----------------------------------------------|----------------------------|-------------------------|
| AirMassFactor         | AMF                                           | unitless                   | spatial × image         |
| ClearAirMassFactor    | AMF (cloud-free condition)                    | unitless                   | spatial × image         |
| AMFCloudFraction      | Air mass factorCloud radiance fraction        | unitless                   | spatial × image         |
| AMFCloudPressure      | Cloud top pressure                            | hPa                        | spatial × image         |
| AMFDiagnostic         | Diagnostic flags in AMF calculation           | unitless                   | spatial × image         |
| AMFSurfaceLER         | Surface Lambertian-equivalent reflectivity    | unitless                   | spatial × image         |
| ColumnAmount          | HCHO VCD                                      | molecules cm <sup>-2</sup> | spatial × image         |
| ColumnUncertainty     | Random uncertainty of the VCD                 | molecules cm <sup>-2</sup> | spatial × image         |
| DSCD                  | Retrieved SCD before background correction    | molecules cm <sup>-2</sup> | spatial × image         |
| FitConvergenceFlag    | Degree of convergence of the spectral fitting | unitless                   | spatial × image         |
| FittingRMS            | Fitting root mean square error                | unitless                   | spatial × image         |
| GasProfile            | HCHO a priori profile                         | molecules cm <sup>-3</sup> | layer × spatial × image |
| Layer                 | Pressure profile                              | hPa                        | layer × spatial × image |
| ScatteringWeight      | Scattering weight                             | unitless                   | spatial × image         |
| ClearScatteringWeight | Scattering weight (cloud-free condition)      | unitless                   | spatial × image         |
| FinalAlgorithmFlags   | Final algorithm flags                         | unitless                   | spatial × image         |

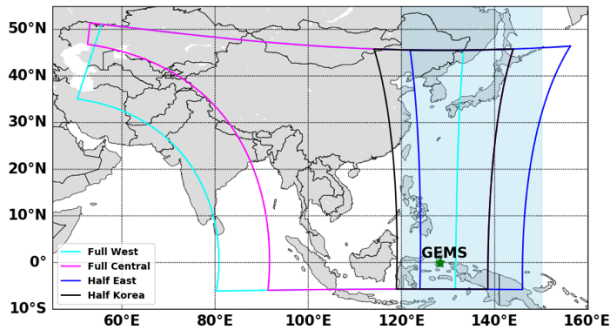

Fig. S1. Operational scan domain of GEMS (adapted from Kwon et al., 2019) : half eastern scan (blue), half Korea scan (black), full central scan (magenta), full western scan (cyan), and GEMS location (green star). Shaded areas (120–150° E) represent regions for radiance references and common mode.

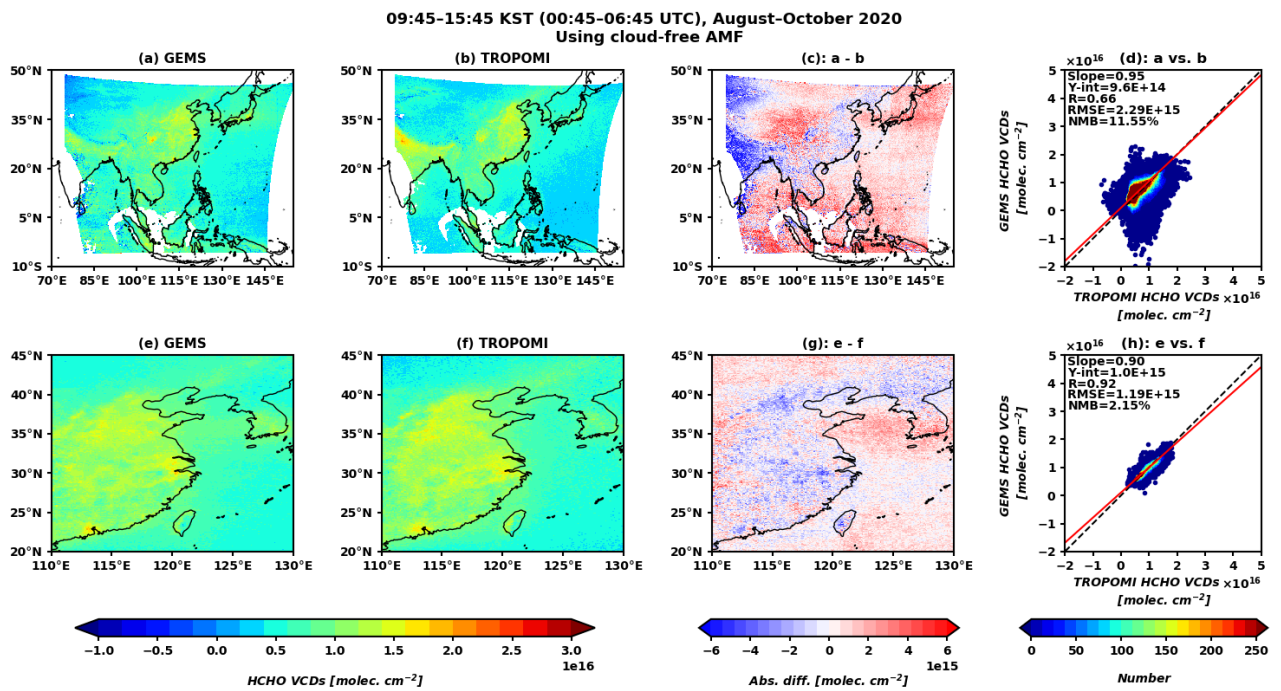

Fig. S2. Same as Fig. 9 except for the AMF computation under the cloud-free assumption.

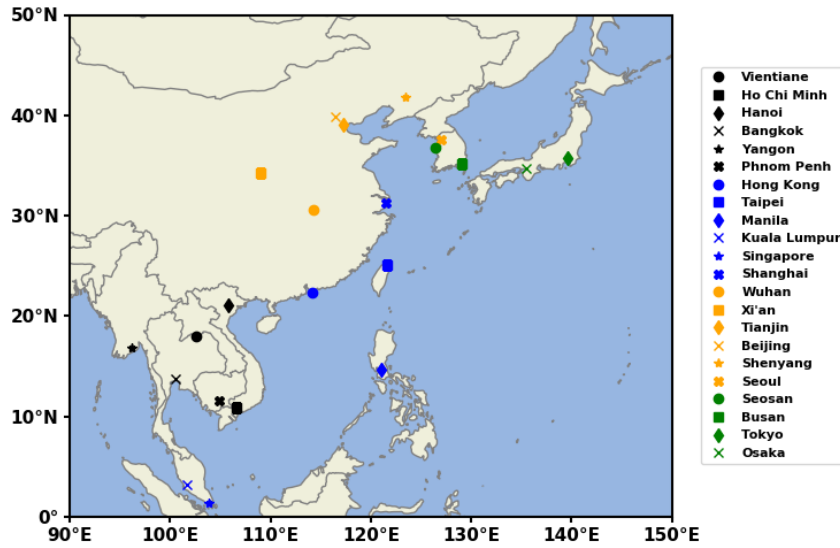

Fig. S3. Regions selected for the comparison between GEMS and TROPOMI.

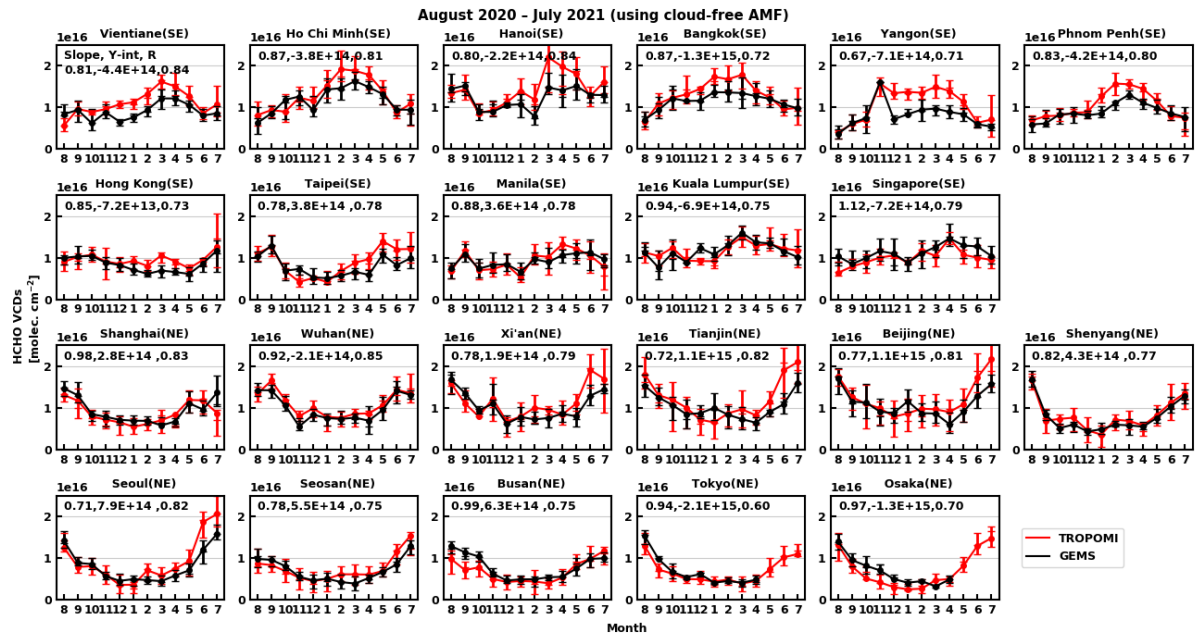

Fig. S4. Same as Fig. 11 except for the AMF computation under the cloud-free assumption.

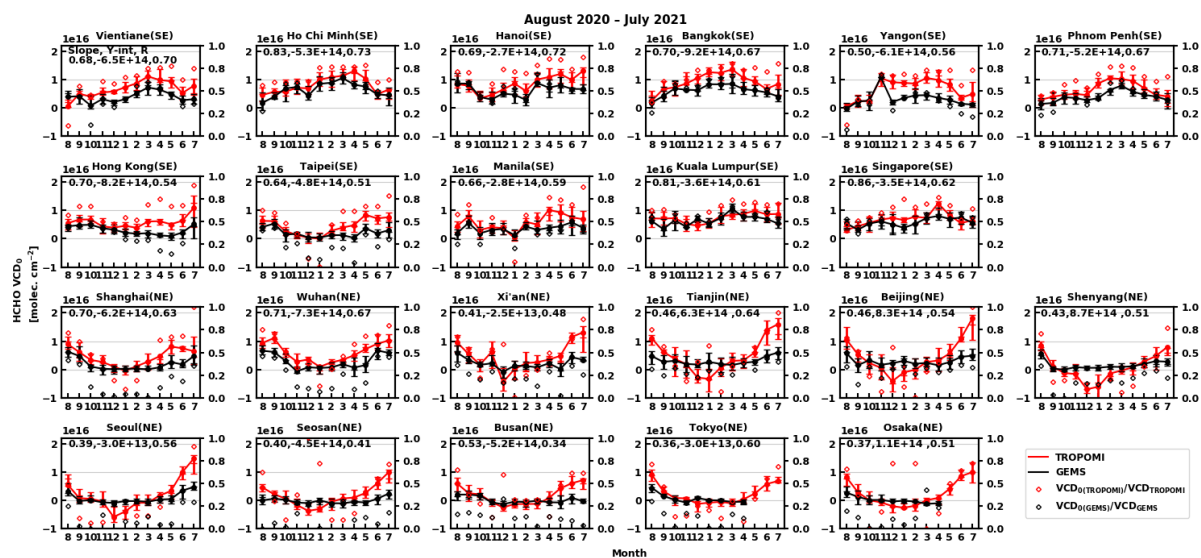

Fig. S5. Same as Fig. 11 but for  $VCD_0$  (VCDs without background contributions). Diamonds represent an absolute value of  $VCD_0/VCD$ .

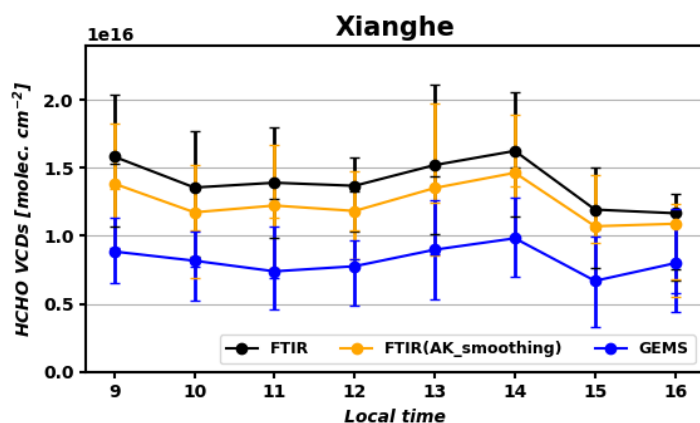

Fig. S6. Same as Fig. 16 except for FTIR observation.

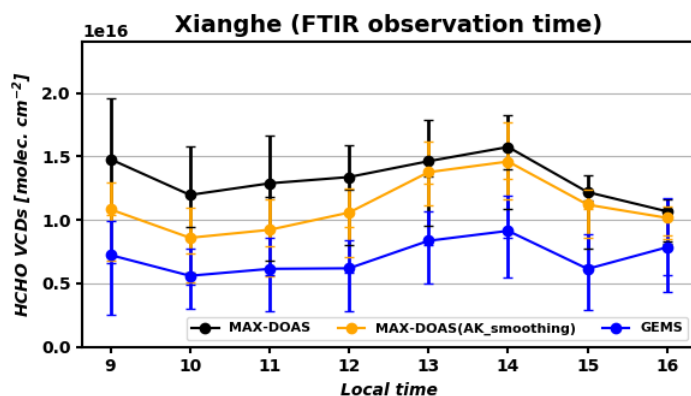

Fig. S7. Same as Fig. 13 except for the MAX-DOAS HCHO in FTIR observation time.

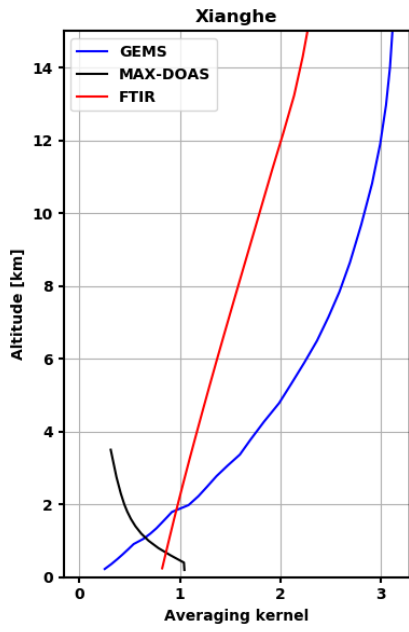

Fig. S8. Daily mean averaging kernels of GEMS (blue), MAX-DOAS (black), and FTIR (red) during 3 August 2020.
